# Supplementary material for: Adsorption behavior of magnetic amino-functionalized metal–organic framework for cationic and anionic dyes from aqueous solution
Source: Royal Society of Chemistry journal article supplement (doi:10.1039/c6ra07567c), 2016-01-01
Supplement: c6ra07567c1.pdf [file c6ra07567c1.pdf]

Adsorption behavior of magnetic amino-functionalized metal-organic  
framework for cationic and anionic dyes from aqueous solution

Haochi Liu<sup>a</sup>, Ligang Chen<sup>a,\*</sup>, Jie Ding<sup>b,\*\*</sup>

<sup>a</sup> Department of Chemistry, College of Science, Northeast Forestry University, 26  
Hexing Road, Harbin 150040, China

<sup>b</sup> State Key Laboratory of Urban Water Resource and Environment, Harbin Institute  
of Technology, Harbin 150090, China

\*Tel.: +86-451- 82190679 E-mail: ligangchen2010@aliyun.com (L. Chen)

\*\*Tel.: +86-451- 86289113 E-mail: hitdingjie@163.com (J. Ding)

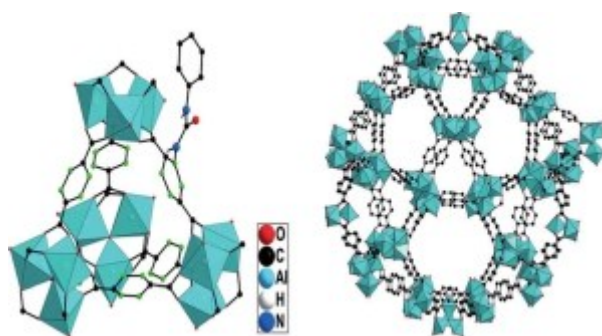

Fig. S1. The structure of MIL-101.<sup>1</sup>

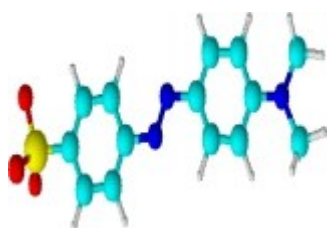

Methyl Orange

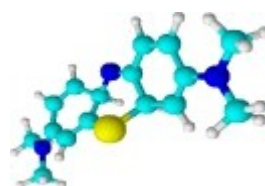

Methylene Blue

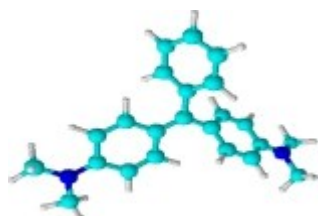

Malachite Green

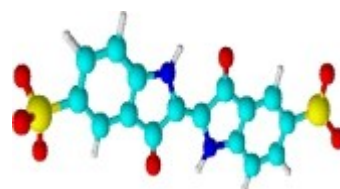

Indigo Carmine

Fig. S2. The structures of four different dyes

Table S1. The existing form and distribution curve of these dyes under different pH conditions

|               |    | Main existing forms                                                                                                                                                                                                  | Distribution curve                                                                    |
|---------------|----|----------------------------------------------------------------------------------------------------------------------------------------------------------------------------------------------------------------------|---------------------------------------------------------------------------------------|
| Anionic dyes  | MO | 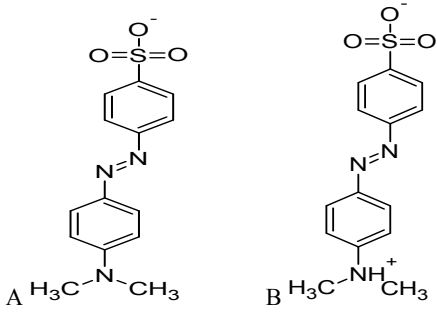 <p>A <math>\text{H}_3\text{C}-\text{N}(\text{CH}_3)_2</math>      B <math>\text{H}_3\text{C}-\text{NH}^+(\text{CH}_3)_2</math></p> |    |
|               | IC |  <p>A      B      C</p>                                                                                                            |   |
| Cationic dyes | MG |  <p>A      B      C      D</p>                                                                                                    |  |
|               | MB |  <p>A      B      C</p>                                                                                                           |  |

Table S2. The maximum adsorbance wavelength, molecular size, logP of the four dyes

| Dyes            | Maximum adsorbance wavelength<br>(nm) | Molecular size<br>(Å×Å ×Å) | logP |
|-----------------|---------------------------------------|----------------------------|------|
| Methyl orange   | 463                                   | 5.31×7.25×17.39            | 2.61 |
| Methylene blue  | 664                                   | 16.75×8.01×4.58            | 2.61 |
| Malachite green | 617                                   | 13.8×9.9×4.2               | 4.85 |
| Indigo carmine  | 610                                   | 11.21×1.63×7.94            | 1.01 |

Note: the molecular size is measured by ChemBioDraw along the direction of the two sulfonic groups.

## Reference

1. T. Wittmann, R. Siegel, N. Reimer, W. Milius, N. Stock and J. Senker, *Chem. -Eur. J.*, 2015, **21**, 314-323.
